# Supplementary material for: Utilization of crown ethers to stabilize the dinuclear μ-oxo bridged iron(iii) aqua ion, [(H2O)5Fe(μ-O)Fe(OH2)5]4+
Source: Royal Society of Chemistry journal article supplement (doi:10.1039/b105691n), 2002-01-01
Supplement: b105691n.doc [file b105691n.doc]

# Supplementary Data

**Fig. S1** Diffuse reflectance UV-visible spectrum of **1**. (The sharp decrease at 800 nm at the

maximum of the 800 nm band is due to a change in dectector

Hydrogen bonding data for compounds **1**, **2** and **3**

**Table 1.** Hydrogen bonds (Å) for [(H2O)5FeOFe(H2O)5](NO3)4.(18-crown-6)2,(**1**)

___________________________________________________________________

D-H...A d(D-H) d(H...A) d(D...A) <(DHA)

_____________________________________________________________________

O(1Z)-H(1ZB)...O(1C) 0.996(10) 1.749(15) 2.737(6) 171(5)

O(1Z)-H(1ZA)...O(1B)#2 0.998(10) 1.702(17) 2.689(6) 169(6)

O(1X)-H(1XB)...O(6C) 0.995(10) 1.720(13) 2.712(6) 174(7)

O(1Y)-H(1YA)...O(1B) 0.999(10) 1.682(16) 2.676(6) 172(6)

O(1Y)-H(1YB)...O(4C)#1 0.998(10) 1.777(16) 2.764(6) 170(5)

O(1V)-H(1VA)...O(5C) 0.998(10) 1.871(13) 2.860(6) 170(5)

O(1W)-H(1WA)...O(1A)#3 1.000(10) 1.75(4) 2.628(7) 145(6)

O(1X)-H(1XA)...O(1A)#4 0.994(10) 1.618(15) 2.598(7) 167(5)

O(1V)-H(1VB)...O(3C) 0.995(10) 1.85(3) 2.767(6) 152(6)

_____________________________________________________________________

Symmetry transformations used to generate equivalent atoms:

#1 -x+1,y,-z+3/2 #2 -x+1,-y,-z+1 #3 -x+1,y-1,-z+3/2

#4 x,y-1,z

**Table 2.** Hydrogen bonds (Å and o) for [(H2O)5FeOFe(H2O)5](ClO4)4.(18-crown-6)2.2H2O(**2**)

_____________________________________________________________________

D-H...A d(D-H) d(H...A) d(D...A) <(DHA)

_____________________________________________________________________

O(1)-H(1B)...O(4A) 0.89 1.88 2.751(2) 166.7

O(1)-H(1A)...O(1A) 0.90 1.88 2.771(2) 170.4

O(3)-H(3B)...O(6A) 0.95 1.75 2.685(2) 168.7

O(3)-H(3A)...O(13)#1 0.92 2.09 2.934(2) 152.8

O(3)-H(3A)...O(7) 0.92 2.41 2.961(3) 119.0

O(4)-H(4B)...O(3A) 0.86 1.87 2.670(2) 153.5

O(4)-H(4A)...O(13) 0.83 1.96 2.782(2) 170.4

O(4)-H(4A)...Cl(2) 0.83 2.95 3.6559(17) 144.8

O(5)-H(5B)...O(5A) 0.82 1.94 2.763(2) 173.6

O(5)-H(5A)...O(9) 0.90 1.94 2.837(3) 176.2

O(5)-H(5A)...Cl(1) 0.90 2.90 3.7286(18) 154.3

O(6)-H(6B)...O(2A) 0.88 1.90 2.779(2) 170.7

O(6)-H(6A)...O(1S) 0.79 1.86 2.647(2) 170.8

O(1S)-H(1SA)...O(8)#2 0.94 2.03 2.896(3) 151.9

O(1S)-H(1SB)...O(12)#1 0.91 2.06 2.961(3) 169.1

O(1S)-H(1SB)...Cl(2)#1 0.91 2.83 3.664(2) 151.8

_____________________________________________________________________

Symmetry transformations used to generate equivalent atoms:

#1 -x+1,-y,-z+1 #2 x-1,y,z

**Table 3.** Hydrogen bonds(Å and o) for

[(H2O)5FeOFe(H2O)5](NO3)10[Fe(H2O)6]2(15-crown-5)4.(H2O)6(**3**)

_____________________________________________________________________

D-H...A d(D-H) d(H...A) d(D...A) <(DHA)

_____________________________________________________________________

O(2)-H(22)...O(14) 0.92 2.00 2.878(3) 160.3

O(2)-H(21)...O(21) 0.94 1.84 2.784(3) 174.5

O(3)-H(32)...O(2S)#1 0.89 1.84 2.695(3) 160.0

O(3)-H(31)...O(16) 0.83 1.91 2.707(3) 159.4

O(4)-H(42)...O(1S) 0.88 1.85 2.705(3) 162.1

O(4)-H(41)...O(19) 0.86 1.95 2.741(3) 152.4

O(4)-H(41)...O(17)#2 0.86 2.44 2.873(3) 111.3

O(5)-H(52)...O(2S) 0.91 1.80 2.695(3) 167.2

O(5)-H(51)...O(22)#2 0.91 1.83 2.735(3) 171.1

O(6)-H(62)...O(1S)#1 0.89 1.77 2.651(3) 171.0

O(6)-H(61)...O(15) 0.91 1.77 2.667(3) 169.8

O(7)-H(72)...O(5A) 0.91 1.83 2.718(3) 164.4

O(7)-H(72)...O(1A) 0.91 2.53 3.019(3) 114.1

O(7)-H(71)...O(2A) 0.75 1.92 2.658(3) 167.3

O(8)-H(82)...O(4B) 0.83 1.90 2.694(2) 160.4

O(8)-H(81)...O(1B) 0.96 1.73 2.680(2) 169.9

O(9)-H(92)...O(23) 0.95 1.70 2.641(3) 169.3

O(9)-H(91)...O(25) 1.00 1.69 2.617(3) 152.3

O(10)-H(101)...O(27)#3 0.88 1.69 2.571(2) 171.3

O(10)-H(101)...N(5)#3 0.88 2.46 3.308(3) 160.1

O(10)-H(101)...O(26)#3 0.88 2.59 3.249(3) 132.2

O(10)-H(102)...O(4A) 0.89 1.84 2.712(3) 165.8

O(11)-H(112)...O(2B) 0.90 1.74 2.617(3) 164.1

O(11)-H(111)...O(24) 0.79 1.96 2.744(3) 172.5

O(12)-H(122)...O(3S) 0.88 1.65 2.522(3) 172.5

O(12)-H(121)...O(13)#2 0.92 1.83 2.753(3) 175.6

O(12)-H(121)...O(15)#2 0.92 2.45 3.074(3) 125.4

O(12)-H(121)...N(1)#2 0.92 2.48 3.338(3) 155.0

O(1S)-H(1S2)...O(3A) 0.91 1.78 2.684(3) 172.3

O(1S)-H(1S1)...O(1A) 0.85 1.94 2.784(3) 168.3

O(2S)-H(2S2)...O(18)#2 0.95 1.90 2.846(3) 170.4

O(2S)-H(2S1)...O(20)#4 0.87 2.01 2.864(3) 167.7

O(2S)-H(2S1)...O(19)#4 0.87 2.65 3.260(3) 128.3

O(2S)-H(2S1)...N(3)#4 0.87 2.67 3.469(3) 153.4

O(3S)-H(3S2)...O(21)#5 0.89 1.95 2.813(3) 161.1

O(3S)-H(3S1)...O(18)#5 0.91 1.92 2.820(3) 169.9

O(3S)-H(3S1)...O(16)#5 0.91 2.51 3.079(3) 121.5

O(3S)-H(3S1)...N(2)#5 0.91 2.54 3.360(3) 149.9

_____________________________________________________________________

Symmetry transformations used to generate equivalent atoms:

#1 -x,-y+2,-z #2 -x+1/2,y+1/2,-z #3 -x,-y+2,-z-1

#4 x-1/2,-y+5/2,z #5 -x+1,-y+2,-z
